# Supplementary material for: A multicenter prospective study on the ESC algorithm for the early diagnosis of non-ST-elevation myocardial infarction
Source: PubMed Central journal article supplement — iScience. 2024 Aug 5;27(9):110643. doi: 10.1016/j.isci.2024.110643 (PMC11388160; doi:10.1016/j.isci.2024.110643), 2024-08-05
Supplement: mmc1.pdf [file mmc1.pdf]

**Supplemental information**

**A multicenter prospective study on the ESC  
algorithm for the early diagnosis  
of non-ST-elevation myocardial infarction**

**Yahui Lin, Hong Zhan, Shukui Wang, Guozheng Zhang, Zi Ye, Caidong Liu, Dong Wang, Dongfang Gao, Qing Yang, Zebin Gong, Guangxun Feng, Min Liu, Wenke Li, Yanmin Yang, Jun Zhu, Zhou Zhou, and Yan Liang**

## **Supplemental information**

# **A Multicenter Prospective Study on the ESC Algorithm for the Early Diagnosis of Non-ST-Elevation Myocardial Infarction**

**Running title: Rapid diagnostic algorithm NSTEMI: a prospective multicenter cohort  
study in China**

Ya-hui Lin, Hong Zhan, Shu-kui Wang, Guo-zheng Zhang, Zi Ye, Cai-dong Liu, Dong Wang, Dong-fang Gao, Qing Yang, Ze-bin Gong, Guang-xun Feng, Min Liu, Wen-ke Li, Yan-min Yang, Jun Zhu, Zhou Zhou, Yan Liang

**Figure S1 Study flowchart**

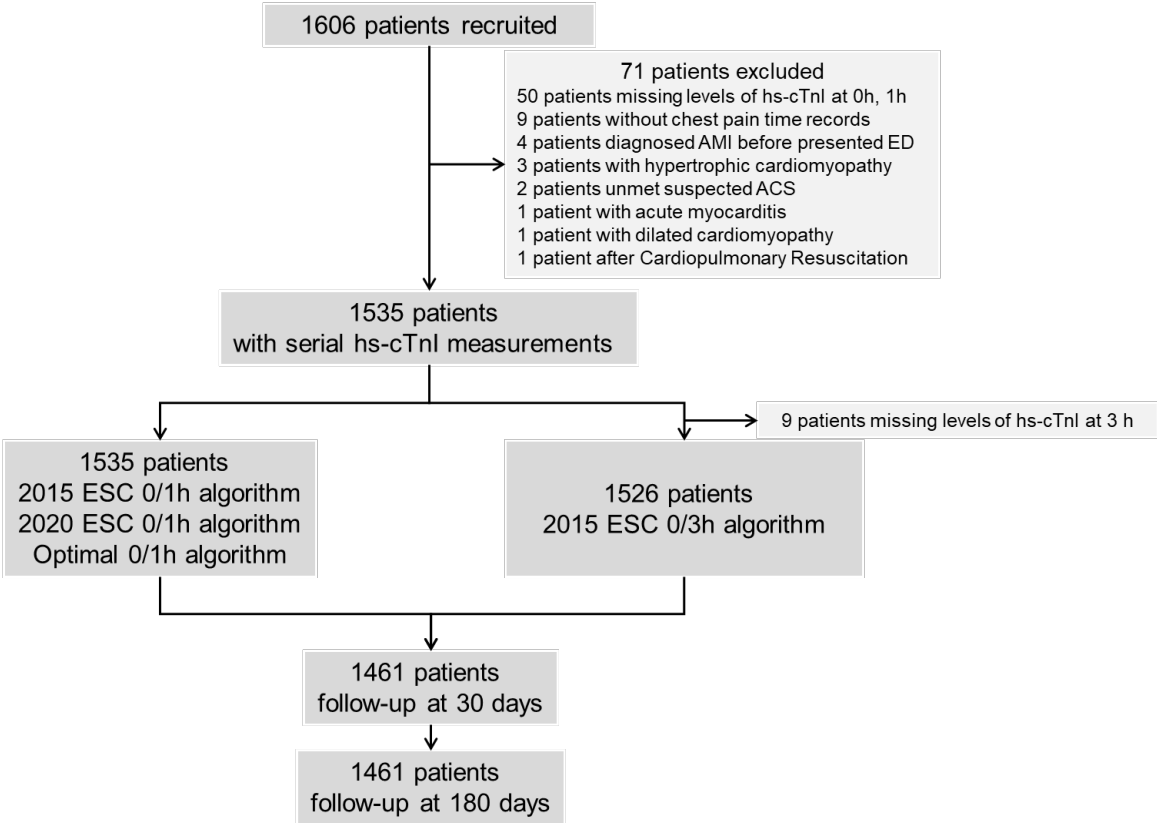

Figure S2 The accuracy of hs-cTnI in diagnosing AMI at different time points

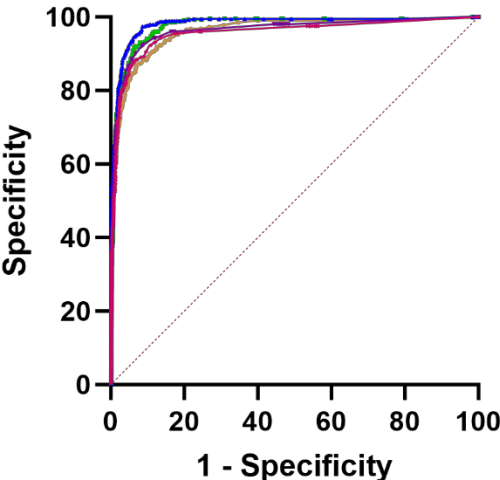

|      | AUC                  | Compared to 0h | Compared to 1h | Compared to 3h | Compared to 0-1h |
|------|----------------------|----------------|----------------|----------------|------------------|
| 0h   | 0.961 ( 0.949-0.972) |                |                |                |                  |
| 1h   | 0.975 ( 0.967-0.984) | p<0.001        |                |                |                  |
| 3h   | 0.981 ( 0.973-0.989) | p<0.001        | p<0.001        |                |                  |
| 0-1h | 0.963 ( 0.951-0.975) | p=0.559        | p=0.020        | p<0.001        |                  |
| 0-3h | 0.955 ( 0.942-0.969) | p=0.652        | p=0.002        | p<0.001        | p=0.209          |

**Figure S3 Diagnostic performance of the 2015 ESC 0/3-hour algorithm using hs-cTnI**

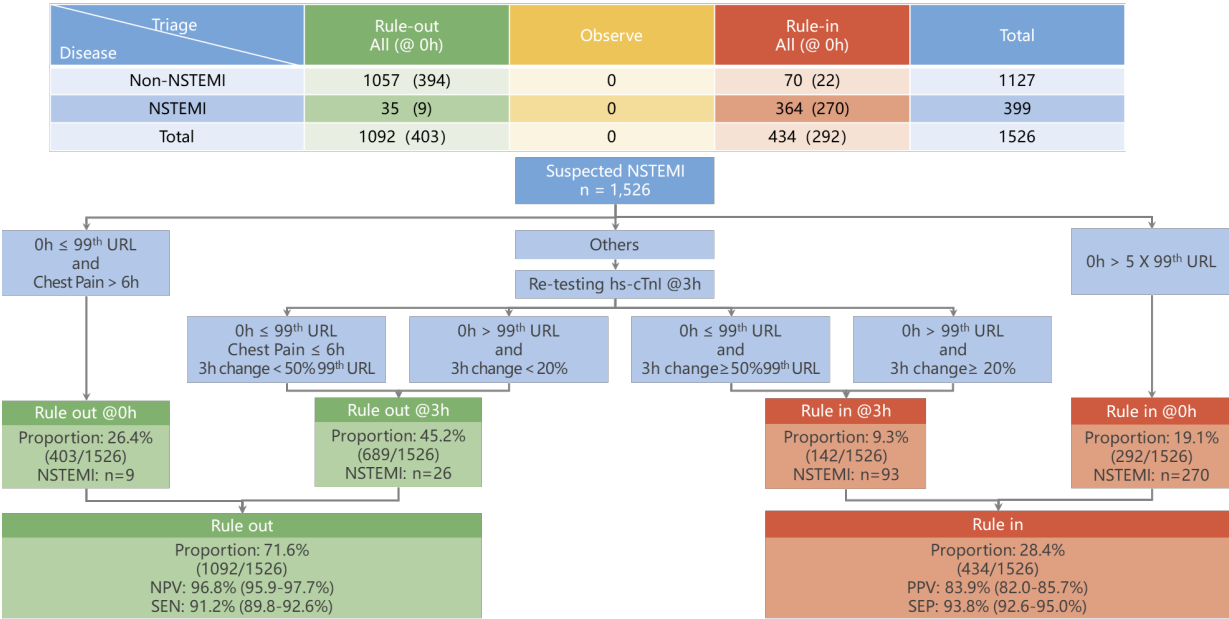

Illustration of the derived algorithm and test characteristics of the cohorts.

NPV, negative predictive value; SEN, sensitivity; PPV, positive predictive value; SEP, specificity.

Figure S4 Sensitivity and NPV of each hs-cTnI at different concentrations

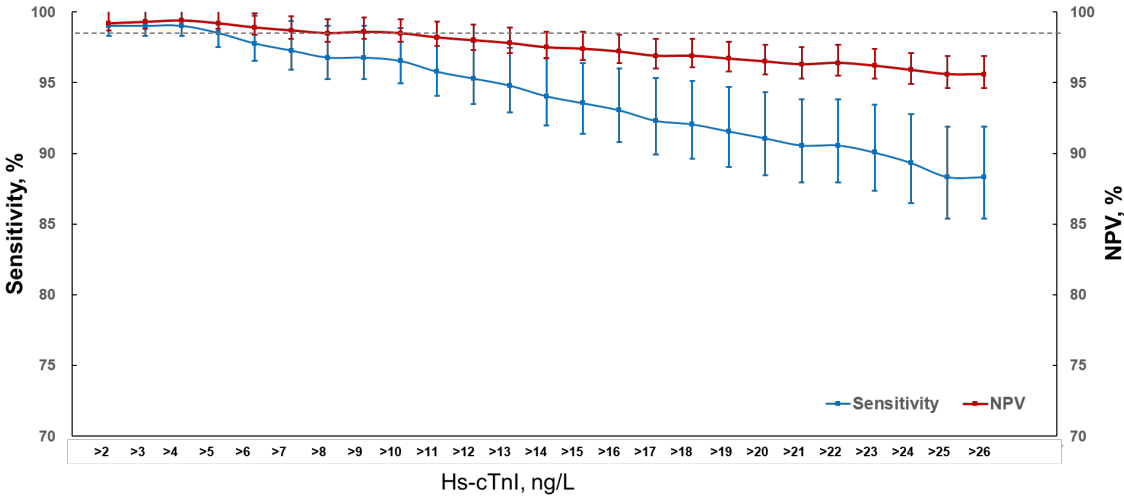

**Figure S5 Comparison of the prognostic performance of the algorithms in Rule-out group**

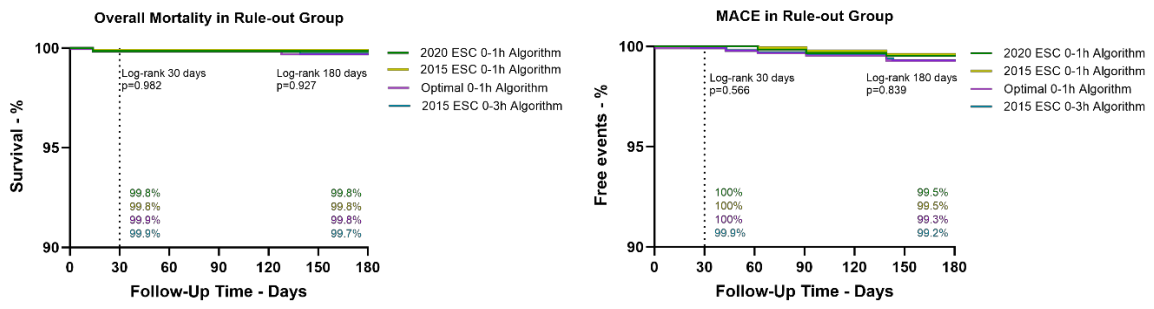

Figure S6 Comparison of the prognostic performance of the algorithms in Observed group

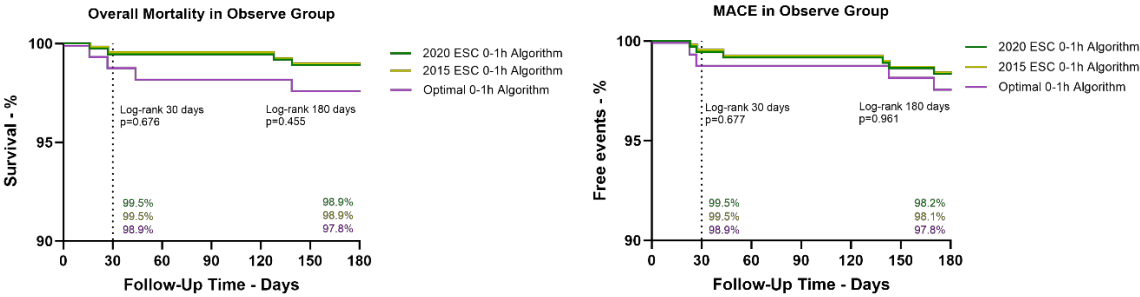



**Figure S7 Comparison of the prognostic performance of the algorithms in Rule-in group**

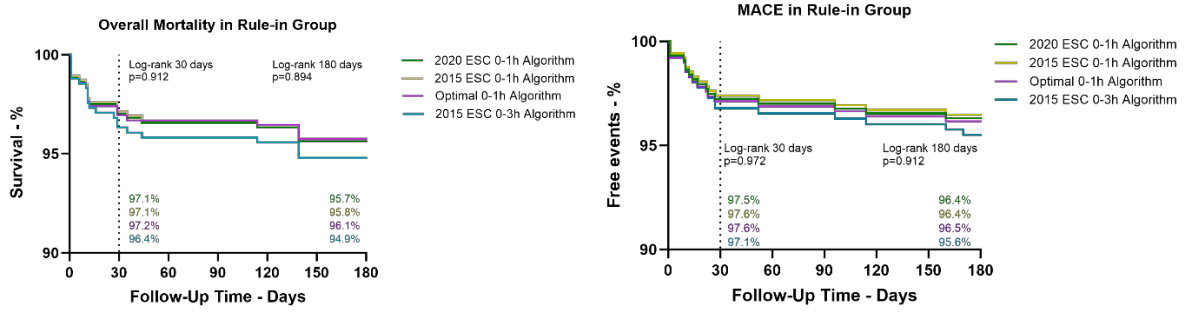

**Table S1 Time between the first and second blood draws for serial hs-cTnI measurements**

|             | 0-1 h time interval | 0-3 h time interval |
|-------------|---------------------|---------------------|
| Mean Time   | 1:00                | 2:58                |
| Median Time | 1:00                | 3:00                |
| 10th, 90th  | 0:57, 1:05          | 2:48, 3:05          |

**Table S2 Blood concentrations of hs-cTnI**

|                                    | <b>0 h</b>                     | <b>1 h</b>          | <b>3 h</b>           |  | <b>Δ0-1 h Change</b> | <b>Δ0-3 h Change</b> |
|------------------------------------|--------------------------------|---------------------|----------------------|--|----------------------|----------------------|
|                                    | <b>Overall</b>                 |                     |                      |  |                      |                      |
| <b>Non-NSTEMI</b><br><b>N=1133</b> | 3<br>(2, 8)                    | 3<br>(2, 8)         | 3<br>(2, 9)          |  | 0<br>(0, 1)          | 1<br>(0, 1)          |
| <b>NSTEMI</b><br><b>N=402</b>      | 403*<br>(79, 2066)             | 496*<br>(125, 2352) | 780*<br>(199, 2946)  |  | 65*<br>(15, 331)     | 200*<br>(41, 979)    |
|                                    | <b>Chest pain &gt; 3 hours</b> |                     |                      |  |                      |                      |
| <b>Non-NSTEMI</b><br><b>N=731</b>  | 3<br>(2, 9)                    | 3<br>(2, 9)         | 4<br>(2, 10)         |  | 0<br>(0, 1)          | 1<br>(0, 1)          |
| <b>NSTEMI</b><br><b>N=301</b>      | 507*<br>(132, 2587)            | 645*<br>(179, 3015) | 933*<br>(229, 3070)  |  | 77*<br>(17, 341)     | 209*<br>(41, 963)    |
|                                    | <b>Chest pain ≤ 3 hours</b>    |                     |                      |  |                      |                      |
| <b>Non-NSTEMI</b><br><b>N=402</b>  | 3<br>(2, 7)                    | 3<br>(2, 7)         | 3<br>(2, 8)          |  | 1<br>(0, 1)          | 1<br>(0, 1)          |
| <b>NSTEMI</b><br><b>N=101</b>      | 89*†<br>(25, 692)              | 165*†<br>(52, 921)  | 416*†<br>(109, 1723) |  | 36*†<br>(11, 247)    | 186*<br>(41, 1142)   |

The median (25th, 75th), ng/L; \* Indicates  $P < 0.05$  for non-NSTEMI patients. † Indicates  $P < 0.05$  for patients with Chest pain > 3 hours.

**Table S3 Demographic and clinical information of two patients with a diagnosis of myocardial infarction missed by the hs-cTnI 0/1-hour algorithm**

| <b>Patient ID</b>                          |     | <b>1145</b> | <b>1802</b>              |
|--------------------------------------------|-----|-------------|--------------------------|
| Age                                        |     | 60          | 59                       |
| Sex                                        |     | Female      | Female                   |
| Time from CPO to first study blood draw, h |     | 1 h10 min   | 7 h                      |
| History of coronary artery disease         |     | No          | No                       |
| History of previous MI                     |     | No          | No                       |
| History of PCI                             |     | No          | No                       |
| History of CABG                            |     | No          | No                       |
| History of hypertension                    |     | No          | No                       |
| History of diabetes                        |     | Yes         | No                       |
| History of hypercholesterolemia            |     | Yes         | No                       |
| History of previous stroke                 |     | No          | No                       |
| History of previous Heart Failure          |     | No          | No                       |
| History of kidney dysfunction              |     | No          | No                       |
| History of peripheral artery disease       |     | No          | No                       |
| hs-cTnI (ng/L; peak value underlined)      | 0 h | <2          | <2                       |
|                                            | 1 h | <2          | <2                       |
|                                            | 3 h | <2          | <2                       |
| ST-depression                              |     | No          | No                       |
| T-inversion                                |     | No          | No                       |
| RWMA                                       |     | No          | No                       |
| ECHO                                       |     | Normal      | LV motion incoordination |
| Clinical discharge diagnosis               |     | NSTEMI      | NSTEMI                   |
| Medicine treatment                         |     | Yes         | Yes                      |
| CABG performed                             |     | No          | No                       |
| PCI performed                              |     | No          | No                       |
| NSTEMI type                                |     |             |                          |
